# Supplementary material for: A zirconium-based metal–organic framework sensitized by thioflavin-T for sensitive photoelectrochemical detection of C-reactive protein
Source: Royal Society of Chemistry journal article supplement (doi:10.1039/c9cc05086h), 2019-01-01
Supplement: c9cc05086h1.pdf [file c9cc05086h1.pdf]

# Electronic Supplementary Information

## Zirconium-Based Metal-Organic Framework Sensitized by Thioflavine-T for Sensitive Photoelectrochemical Detection of C-Reactive Protein

Mengjie Li, Haijun Wang, Ruo Yuan\*, Yaqin Chai\*□

*Key Laboratory of Luminescent and Real-Time Analytical Chemistry (Southwest University), Ministry of Education, College of Chemistry and Chemical Engineering, Southwest University, Chongqing 400715, PR China.*

---

\* Corresponding author. Tel.: +86-23-68252277; Fax: +86-23-68253172.

E-mail address: [yuanruo@swu.edu.cn](mailto:yuanruo@swu.edu.cn) (R.Yuan), [yqchai@swu.edu.cn](mailto:yqchai@swu.edu.cn) (Y. Q. Chai)

## **Table of Contents**

Materials and reagents (Table S1)

Apparatus

PEC measurement

Experimental section

Condition optimization (Figure S1)

Electrochemical characterization of the PEC biosensor (Figure S2)

Comparison of different methods for protein analysis (Table S2)

SEM and EDX spectrum characterization (Figure S3)

*PEC analysis of CRP* (Figure S4)

### *Materials and reagents*

N,N'-diethylformamide (DEF), 4,4',4''-s-triazine-2,4,6-triyl-tribenzoic acid (H<sub>3</sub>TATB), acetone, ZrOCl<sub>2</sub>•8H<sub>2</sub>O, N,N'-dimethylformamide (DMF), gold chloride tetrahydrate (HAuCl<sub>4</sub>•4H<sub>2</sub>O), hexanethiol (HT), human immunoglobulin G (IgG), bovine serum albumin (BSA), human serum albumin (HSA) and thrombin were bought from Sigma Chemical Co. (St. Louis. MO, USA). Thioflavin-T (Th-T) was purchased from Tokyo Chemical Industry Co., Ltd. C-Reactive Protein (CRP) was obtained from Sino Biological Inc. Carboxyl modified magnetic bead (MB) was purchased from Tianjin BaseLine Chrom Tech Research Centre (Tianjin, China). Hydrogen peroxide (H<sub>2</sub>O<sub>2</sub>) was obtained from Chemical Reagent Co., Ltd. (Chongqing, China). K<sub>4</sub>[Fe(CN)<sub>6</sub>] and K<sub>3</sub>[Fe(CN)<sub>6</sub>] were obtained from Beijing Chemical Reagent Co. (Beijing, China). T4 ligase, 10 × T4 ligase reaction buffer, Phi29 polymerase, 10 × phi29 polymerase reaction buffer and deoxyribonucleoside triphosphate (dNTPs) were purchased from Nanjing Vazyme Biotech Co., Ltd. (Nanjing, China). Carcino-embryonic antigen (CEA) and alpha fetal protein (AFP) were supplied by Biocell (Zhengzhou, China). N-(3-Dimethylaminopropyl)-N'-ethylcarbodiimide hydrochloride (EDC) and N-hydroxy succinimide (NHS) were purchased from Shanghai Medpep Co., Ltd. (Shanghai, China). 0.1 M phosphate buffered solution (PBS, pH 7.4) was prepared with 0.1 M KH<sub>2</sub>PO<sub>4</sub>, 0.1 M KCl and 0.1 M Na<sub>2</sub>HPO<sub>4</sub>. Other chemicals were of analytical grade and utilized in this work without further purification. Ultrapure water was employed for preparing solution in this work. The oligonucleotides sequences listed in Table S1 were ordered from

Sangon Inc. (Shanghai, China).

**Table S1.** The specific oligonucleotides sequences.

| Oligonucleotide | Sequences (from 5' to 3')                                                                |
|-----------------|------------------------------------------------------------------------------------------|
| aptamer         | CGA AGG GGA TTC GAG GGG TGA TTG CGT GCT CCA TTT<br>GGT GTT TTT TTT TTT T-NH <sub>2</sub> |
| primer          | CCA AAT GGA GCA CGC AAT CAC CCC TCG AAA AAG TTA<br>GG                                    |
| capture         | GTG CTC CAT TTG GAA AAA A-SH                                                             |
| padlock probe   | p-CGA GGG GTG ATC CCT AAC CCT AAC CCT AAC<br>TTT TT                                      |

### *Apparatus*

The photoelectrochemical (PEC) test was performed on a PEC workstation (Ivium, Netherlands), which was conducted at room temperature in a three-electrode system by using a platinum wire as the counter electrode, a glassy carbon electrode (GCE,  $\Phi = 4$  mm) as the working electrode and a calomel (saturated KCl) electrode as the reference electrode. Electrochemical characterization was carried out on a CHI 760E electrochemistry workstation (Shanghai Chenhua Instrumission, China). Scanning electron microscopy (SEM, S-4800, Hitachi, Japan) was used for nanomaterial characterization. The powder X-ray diffraction (XRD) pattern characterization was performed on a XD-3 X-ray diffractometer with Cu K $\alpha$  radiation (Purkinje, China).

### *PEC measurement*

PBS (5 mL, 0.1 M, pH 7.4) containing 0.06 M H<sub>2</sub>O<sub>2</sub> was utilized for PEC

measurements. An UV light with a wavelength of 365 nm produced by LED lamp was served as the excitation light source and the applied voltage was set to 0.0 V.

### *Experimental section*

#### *Preparation of PCN-777 and Th-T solution*

The PCN-777 was prepared according to the previous reports.<sup>1</sup> In brief, 60 mg H<sub>3</sub>TATB, 200 mg ZrOCl<sub>2</sub>•8H<sub>2</sub>O and 0.6 mL trifluoroacetic acid were added into 12 mL DEF with continuous ultrasonication, followed by heating at 120 °C for 12 h. Ultimately, the acquired white precipitate was centrifugally washed several times with DMF and acetone, respectively. For preparation of Th-T solution, 2 mg Th-T power was weighed and then added into 2 mL ultrapure water. After 5 mins of ultrasonication, bright yellow homogeneous solution was obtained, which was stored at 4 °C before use.

#### *CRP converting procedure*

Scheme 1A presented the target (CRP) converting procedure. Firstly, 50 µL carboxyl modified magnetic bead (MB) and 50 µL coupling reagent (20 mM EDC and 10 mM NHS) were mixed for 1 h to activate carboxyl of MB. The supernatant was removed via magnetic separation and then the activated MB was redispersed in 50 µL ultrapure water. Afterwards, 50 µL 8 µM amino modified aptamer was added into the above solution and kept for 1 h, which could connect aptamer to MB surface via acylation reaction. Subsequently, 50 µL 8 µM primer was added and incubated at 37 °C for 2 h to achieve hybridization between aptamer and primer, leading to the generation of DNA duplex (aptamer/primer). Then, 50 µL CRP with different

concentrations was dropped into the mixture for reaction at 25 °C. After 30 mins, the aptamer-CRP complex structure would be generated by specific binding and primer could be released from DNA duplex. Finally, primer converted from CRP was separated though magnetic force and then utilized for construction of PEC sensing.

#### *Fabrication of the PEC Biosensor*

After polishing with  $\alpha$ -Al<sub>2</sub>O<sub>3</sub> powder and washing with ultrapure water, the GCE was coated by 20  $\mu$ L PCN-777 solution (1 mg/mL), and then dried at 37 °C for generating an uniform film. Next, the PCN-777 modified GCE was submerged in 1% HAuCl<sub>4</sub> solution for electrodeposition of gold nanoparticles (DepAu), which was run at a constant potential of -0.2 V for 20 s. Afterwards, 20  $\mu$ L 2  $\mu$ M capture was attached on DepAu/PCN-777/GCE surface at 4 °C overnight, followed by blocking nonspecific sites with 15  $\mu$ L 0.1 mM HT. Then, 20  $\mu$ L primer converted from CRP was dropped on the modified GCE surface, and incubated for 2 h at 37 °C. After incubating of 20  $\mu$ L 2  $\mu$ M padlock for 1 h, 5  $\mu$ L 10 U T4 ligase and 5  $\mu$ L 10  $\times$  T4 ligase reaction buffer were added and kept for 2 h. Subsequently, 2  $\mu$ L 10 U phi29 polymerase, 5  $\mu$ L 10  $\times$  phi29 polymerase reaction buffer and 5  $\mu$ L 10 mM dNTPs were simultaneously dropped on the acquired GCE surface for 2 h at 30 °C to achieve RCA, which could generate a large number of periodic G-rich single-stranded DNA (ssDNA). Ultimately, the obtained GCE was coated with 15  $\mu$ L 1 mM Th-T solution at room temperature for 0.5 h, and Th-T could specifically bind with periodic G-rich ssDNA to form numerous G-quadruplex structures. The fabrication of PEC biosensor was shown in Scheme 1.

### Condition optimization

The concentration of  $\text{H}_2\text{O}_2$  in supporting electrolyte is an important consideration that influences the PEC signal. As illustrated in Figure S1A, with the increase of the concentration of  $\text{H}_2\text{O}_2$  from 0.02 M to 0.06 M, the PEC signal was observed to be gradually increased. And then the PEC response reached a plateau when the  $\text{H}_2\text{O}_2$  concentration surpassed 0.06 M. The result hinted that the optimized  $\text{H}_2\text{O}_2$  concentration was 0.06 M. In addition, the selection of excitation wavelength has a tremendous impact on the generation of PEC signal. The PEC signal that generated by excitation with different wavelength light sources (660, 523, 460 and 365 nm) was recorded in Figure S1B. The PEC signal excited by the light with the wavelength of 365 nm (column d) was larger than that of other columns. Thus, the optimal excitation wavelength was chosen to be 365 nm.

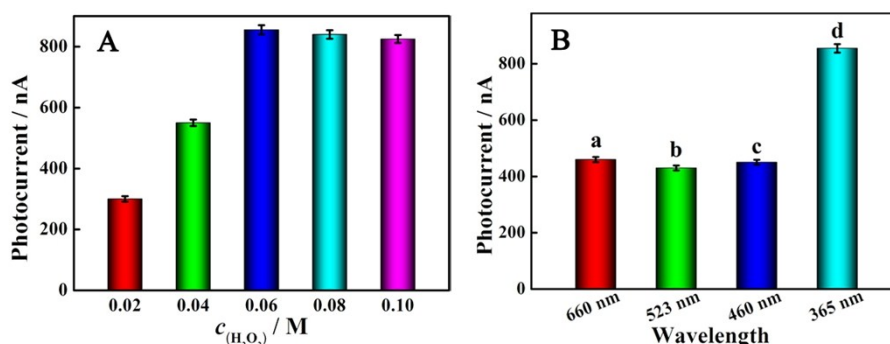

**Figure S1.** Effect of the  $\text{H}_2\text{O}_2$  concentration (A) and the irradiation wavelength (B) on the PEC signal.

### Electrochemical characterization of the PEC biosensor

Electrochemical impedance spectroscopy (EIS) is an effective and facile technique for characterizing the stepwise assembly procedures of the PEC biosensor.

As shown in Figure S2, compared with that of bare GCE (curve a), the charge-transfer resistance ( $R_{et}$ ) of the PCN-777 modified electrode presented obvious enhancement (curve b), which might be derived from the poor conductivity of PCN-777. After the electrodeposition of Au nanoparticles (DepAu), the  $R_{et}$  decreased dramatically (curve c) because of the excellent conductivity of Au nanoparticles. The  $R_{et}$  increased successively when capture, nonconductive HT and primer were continuously incubated on the DepAu/PCN-777/GCE surface, which were presented in curve d, curve e and curve f, respectively. With the immobilization of padlock and T4 ligase, the  $R_{et}$  increased evidently (curve g), which illustrated that the padlock was successfully bound to the modified electrode surface. Once the above electrode was incubated with phi29 polymerase and dNTPs, the  $R_{et}$  increased significantly (curve h), suggesting that the rolling circle amplification (RCA) was on schedule. Ultimately, an evidently decreased  $R_{et}$  was found when the introduction of Th-T occurred (curve i), because Th-T might promote the negatively charged probe to access the electrode surface. These results confirmed the successful assembly of the sensing interface.

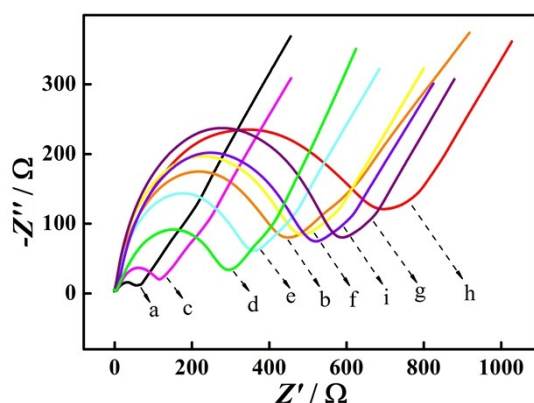

**Figure S2.** EIS responses of (a) bare GCE, (b) PCN-777/GCE, (c) DepAu/PCN-777/GCE, (d) capture/DepAu/PCN-777/GCE, (e) HT/capture/DepAu/PCN-777/GCE, (f)



primer/HT/capture/DepAu/PCN-777/GCE, (g) T4 ligase + padlock/primer/HT/capture/DepAu/PCN-777/GCE, (h) phi29 polymerase + dNTPs/T4 ligase + padlock/primer/HT/capture/DepAu/PCN-777/GCE and (i) Th-T/phi29 polymerase + dNTPs/T4 ligase + padlock/primer/HT/capture/DepAu/PCN-777/GCE in PBS containing KCl (0.1 M) and  $[\text{Fe}(\text{CN})_6]^{3-/4-}$  (5 mM).

**Table S2.** Comparison of different methods for protein analysis.

| Analytical method         | LOD     | Linear range | Ref.            |
|---------------------------|---------|--------------|-----------------|
| fluorescence              | 10 pM   | 0-1 nM       | 2               |
| electrochemistry          | 0.76 pM | 2 pM-20 nM   | 3               |
| surface plasmon resonance | 10 pM   | 10 pM-100 nM | 4               |
| PEC                       | 30 fM   | 100 fM-10 nM | 5               |
| PEC                       | 0.5 pM  | 1 pM-10 nM   | 6               |
| PEC                       | 16 fM   | 50 fM-50 nM  | <b>Our work</b> |

#### *SEM and EDX spectrum characterization*

Nanomaterials were gradually modified on the surface of conductive glass (CG) and then they were characterized by scanning electron microscopy (SEM) and energy dispersive X-ray spectroscopy (EDX) spectrum. Figure S3A was a SEM image of PCN-777/CG, which presented homogeneous octahedrons with average diameter of 2.5  $\mu\text{m}$ . The SEM image of gold nanoparticles (Au NPs) electrodeposited on bare CG surface was shown in Figure S3B and a large number of uniform flower-like shape could be obviously observed. After electrodepositing a layer of Au NPs (DepAu) for 15 s on the PCN-777 modified CG surface, homogeneous octahedrons and flower-like structures could be simultaneously found in Figure S3C. As illustrated in Figure S3D, a flat film covered the modified CG surface when capture was incubated on the

surface of DepAu/PCN-777/CG. Moreover, its EDX spectrum was recorded for further proving the successful immobilization of capture, which was shown in Figure S3G. The existence of C, N, O and P elements indicated that the oligonucleotides sequence (capture) was successfully coated on the modified CG surface. Phosphate buffered solution was used for diluting oligonucleotides sequences, thus Na, Cl and K elements could also be found in Figure S3G. With the immobilization of nonconductive HT, some bright areas were presented in Figure S3E, which originated from electrons gathering around the nonconductive HT. Finally, the introduction of primer led to a uniform film covering the modified CG surface (Figure S3F). The SEM and EDX results of these states demonstrated that the immobilization of nanomaterials was successful during the construction processes of the PEC biosensor.

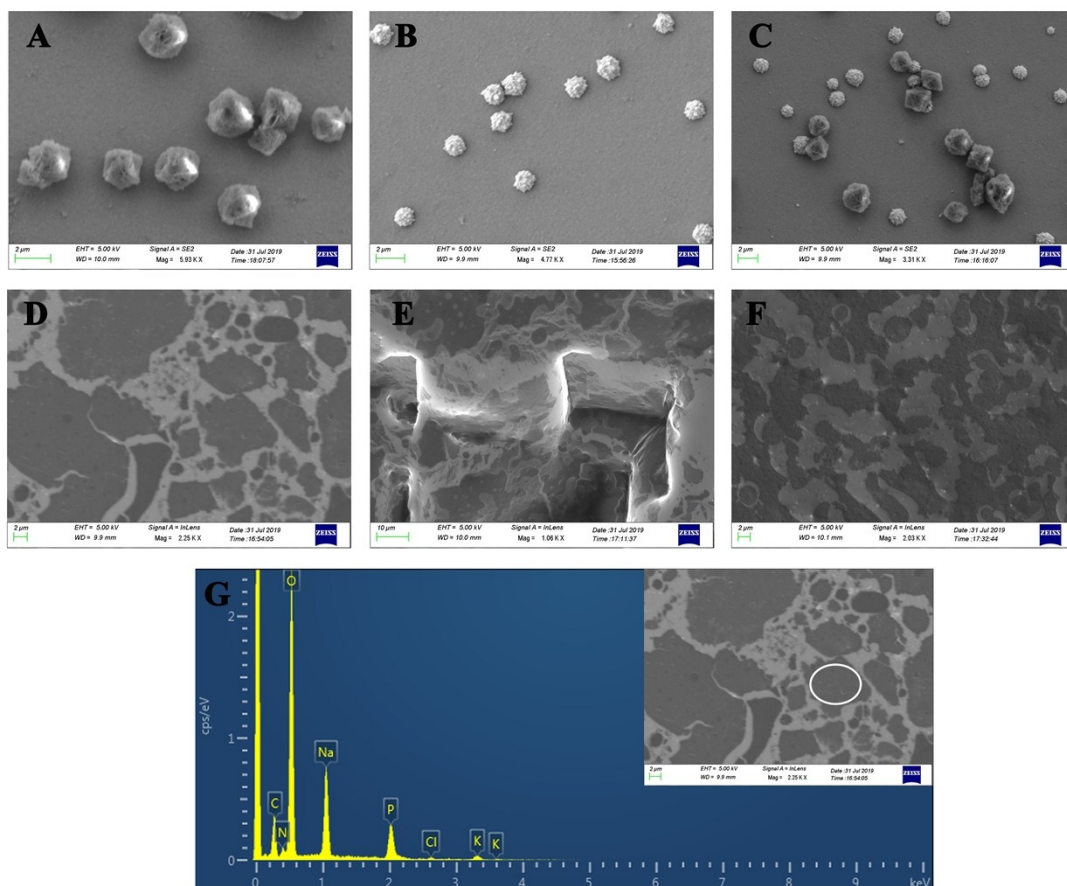

**Figure S3.** SEM of PCN-777/CG (A); DepAu/CG (B); DepAu/PCN-777/CG (C); capture/DepAu/PCN-777/CG (D); HT/capture/DepAu/PCN-777/CG (E); primer/HT/capture/DepAu/PCN-777/CG (F). EDX spectrum of capture/DepAu/PCN-777/CG (G).

### *PEC analysis of CRP*

According to related references<sup>7, 8</sup>, the limit of detection (LOD) in our work was defined as  $LOD = 3S_B/m$ , where  $S_B$  was the standard deviation of the blank and  $m$  was the analytical sensitivity, in which  $m$  could be estimated as the slope of calibration plot at low concentration ranges. The changed trends of photocurrent values with the increasing CRP concentration was presented in Figure S4. The insert demonstrated that the photocurrent values ( $I / nA$ ) was linearly related to the concentration of CRP ( $c / pM$ ) at low concentration range. The corresponding linear equation was  $I_{(nA)} =$

$155.4c_{(\text{pM})} + 424.1$  and the  $S_B$  of twenty times zero-dose was about 0.83. Therefore, the LOD of the proposed PEC biosensor was 0.016 pM (16 fM), demonstrating a high sensitivity of the designed strategy for CRP detection.

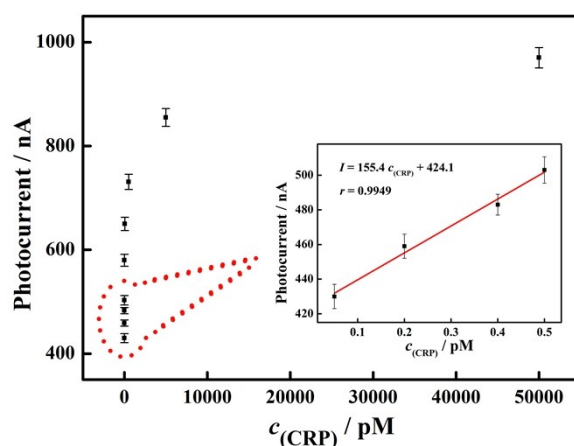

**Figure S4.** The changed trends of PEC response with the increasing of CRP concentration. The insert showed the calibration curve of PEC response vs the CRP concentration at low concentration range.

## REFERENCES

1. D. W. Feng, K. C. Wang, J. Su, T. F. Liu, J. Park, Z. W. Wei, M. Bosch, A. Yakovenko, X. D. Zou and H. C. Zhou, *Angew. Chem. Int. Ed.*, 2015, **54**, 149.
2. H. Zhou, Z. F. Wu, Q. J. Han, H. M. Zhong, J. B. Peng, X. Li and X. L. Fan, *Anal. Chem.*, 2018, **90**, 3220.
3. S. S. Liu, S. L. Zhao, W. W. Tu, X. Y. Wang, X. Wang, J. C. Bao, Y. Wang, M. Han and Z. H. Dai, *Chem. Eur. J.*, 2018, **24**, 3677.
4. A. Hwang, E. Kim, J. Moon, H. Lee, M. Lee, J. Jeong, E. K. Lim, J. Jung, T. Kang and B. Kim, *ACS Appl. Mater. Interfaces*, 2019, **11**, 18960.

5. J. Mohanty, N. Barooah, V. Dhamodharan, S. Harikrishna, P. I. Pradeepkumar and A. C. Bhasikuttan, *J. Am. Chem. Soc.*, 2013, **135**, 367.
6. H. Zhou, Z. F. Wu, Q. J. Han, H. M. Zhong, J. B. Peng, X. Li and X. L. Fan, *Anal. Chem.*, 2018, **90**, 3220.
7. IUPAC, *Pure Appl. Chem.*, 1976, **45**, 107.
8. A. Shrivastava and V. B. Gupta, *Chronicles of Young Scientists*, 2011, **2**, 21.
